# Supplementary material for: STAT3 regulates cytotoxicity of human CD57+ CD4+ T cells in blood and lymphoid follicles
Source: PubMed Central journal article supplement (PMC5824848; doi:10.1038/s41598-018-21389-8), 2018-02-23

# STAT3 regulates cytotoxicity of human CD57+ CD4+ T cells in blood and lymphoid follicles

Jalila Alshekaili<sup>1,2,3,4</sup>, Rochna Chand<sup>1,2</sup>, Cindy Eunhee Lee<sup>1,2</sup>, Susan Corley<sup>5</sup>, Kristy Kwong<sup>1,2</sup>, Ilenia Papa<sup>1</sup>, David A. Fulcher<sup>1</sup>, Katrina L. Randall<sup>1,3</sup>, Jennifer W. Leiding<sup>6</sup>, Cindy S. Ma<sup>7,10</sup>, Marc R. Wilkins<sup>5</sup>, Gulbu Uzel<sup>8</sup>, Chris C. Goodnow<sup>1,7,9</sup>, Carola G. Vinuesa<sup>1</sup>, Stuart G. Tangye<sup>7,9</sup>, Matthew C. Cook<sup>1,2,3</sup>.

<sup>1</sup> Department of Immunology and Infectious Disease, John Curtin School of Medical Research, Australian National University, ACT, 2601. Australia

<sup>2</sup> Translational Research Unit, Level 6 Building 10, Canberra Hospital, Woden, ACT, 2606. Australia

<sup>3</sup> Department of Immunology, Canberra Hospital, Woden, ACT, 2606. Australia

<sup>4</sup> Current address, Department of Microbiology and Immunology, Sultan Qaboos University Hospital, Oman

<sup>5</sup> Systems Biology Initiative, School of Biotechnology and Biomolecular Science, University of New South Wales, Sydney, Australia

<sup>6</sup> Division of Allergy, Immunology, and Rheumatology, Department of Pediatrics, University of South Florida, St Petersburg, Florida

<sup>7</sup> Immunology Division, Garvan Institute of Medical Research, 384 Victoria Street, Darlinghurst, NSW, 2010.

<sup>8</sup> Laboratory of Clinical Infectious Diseases, National Institute of Allergy and Infectious Diseases, National Institutes of Health, Bethesda, Maryland. USA

<sup>9</sup> St Vincent's Clinical School, Faculty of Medicine, University of New South Wales, Darlinghurst, NSW, 2010. Australia

## *Correspondence to*

Matthew Cook, Department of Infection and Immunity, John Curtin School of Medical Research, Australian National University, ACT, 0200. Australia; T +61 2 6174 5586; F +61 2 6174 5847; E [matthew.cook@anu.edu.au](mailto:matthew.cook@anu.edu.au)

## *Running title*

Cytotoxic CD57+ CD4+ T cells

## Supplementary figures legends

### **Fig. S1. PD-1 high cells have effector phenotype both in blood and tonsil**

**A.** Representative flow cytometric analysis of level of PD-1 expression by different CD4<sup>+</sup> T cells in blood and tonsils from the same donor according to expression of CXCR5 and CD45RA. Colours of the overlay histogram are derived from the quadrants in the dot plot. **B.** Flow cytometric analysis of expression of CXCR5 and PD-1 (right) in blood and tonsil gated on total CD4<sup>+</sup> T cells (left panel) or according to CD57 status. **C.** Flow cytometric analysis of CXCR5 MFI on different PD-1 CD57 subsets in the tonsil, with summary plots from independent analyses. **D.** Flow cytometric analysis of CCR7 and CD57 by CD4<sup>+</sup> CD45RA<sup>-</sup> T cells in a blood and a tonsil.

### **Fig. S2. Analysis of cytokine and proliferative responses of tonsil CD4<sup>+</sup> T cells defined by PD-1 and CD57 expression**

Representative analysis of intracellular IL-10 and IL-4 expression by tonsils sorted according to CD57 and PD-1, either immediately ex vivo, or after activation with CD2/3/28 and either IL-6 or IL-21 for two days.

### **Fig. S3. Induction of granzyme expression by IL-6**

Purified CD57<sup>+</sup> and CD57<sup>-</sup> subsets of tonsils all Pd-1<sup>hi</sup> were isolated by FACS sorting and stimulated with CD3/28 +/- IL-6 for 1 day then analysed for granzyme expression. Each pair of connected circles indicates the results from a single donor.

**Fig. S4. Analysis of IL-21 receptor expression in CD4+ T cell subsets.**

A. Representative histograms of IL-21R expression by tonsil subsets defined according to CD57+ PD-1<sup>hi</sup> (orange), CD57- PD-1<sup>hi</sup> (red) and CD57- PD-1<sup>lo</sup> (black), and presence or absence of CXCR5 (upper and lower panels). Right panels show results from identical analysis as left panels, with the exception of omission of the IL-21R-specific antibody (fluorescence minus one, FMO). B Summary of IL-21R analysis exemplified in **A**, for CD4+ T cells from blood and tonsils, with subsets defined by CD57 and PD-1 expression.

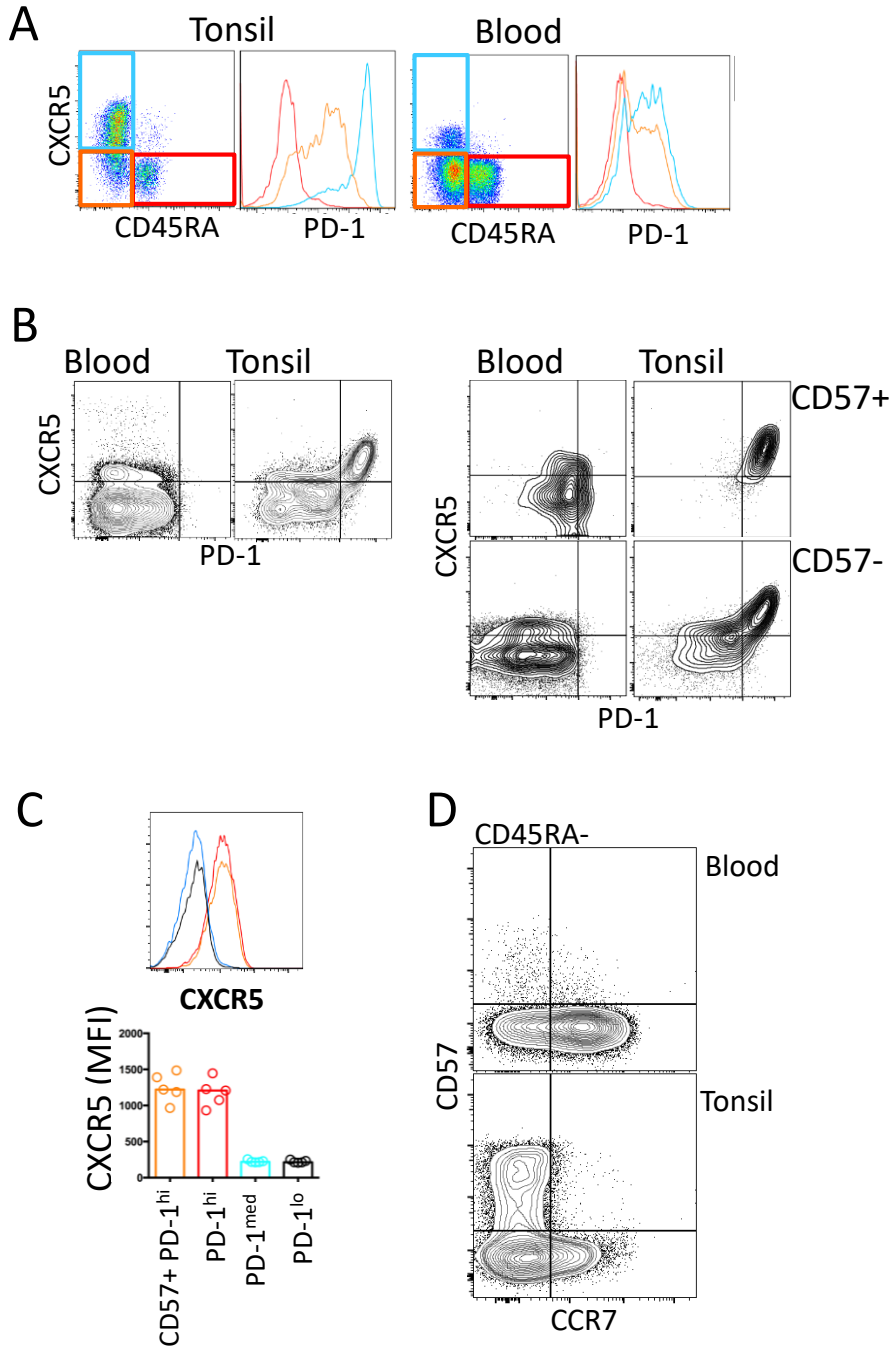

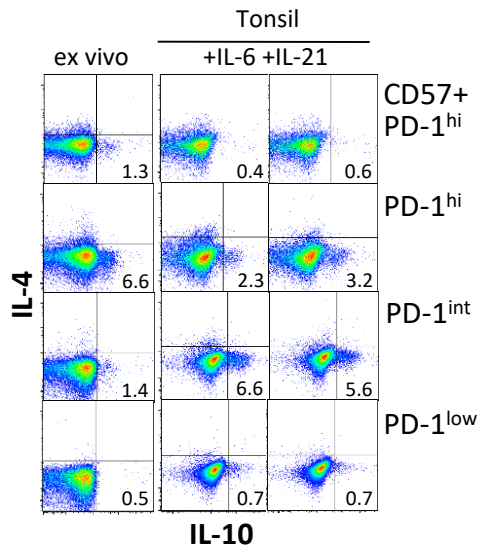

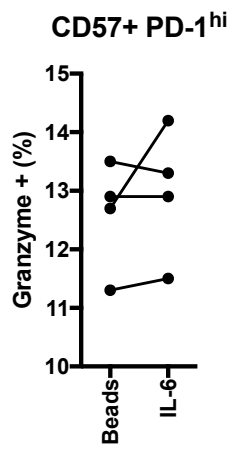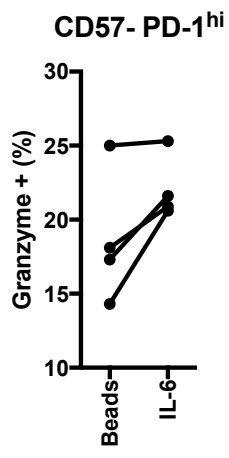

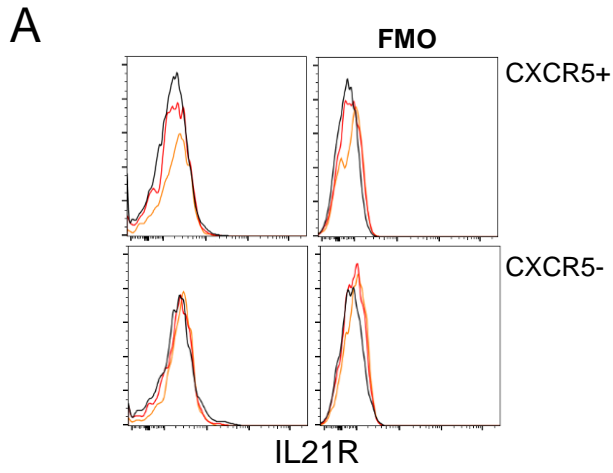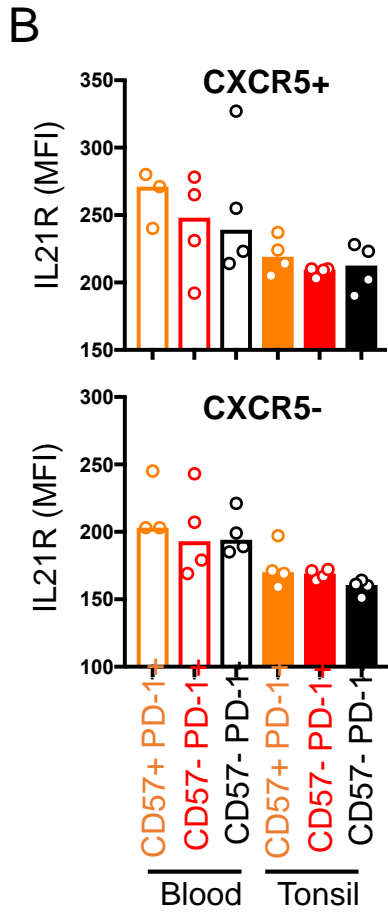

Supplement: 41598_2018_21389_MOESM1_ESM.pdf [file 41598_2018_21389_MOESM1_ESM.pdf]
